# Supplementary material for: Stability of Signaling Pathways during Aging—A Boolean Network Approach
Source: Biology (Basel). 2017 Dec 18;6(4):46. doi: 10.3390/biology6040046 (PMC5745451; doi:10.3390/biology6040046)
Supplement: Supplementary file 1 [file biology-06-00046-s001.xlsx]

## Sheet: S1 Adjacency Matrices of BNs
Following adjacency matrices show all found dependencies. 1 in a column indicates that this gene is input of the gene in the corresponding row index. 0 stands for no dependency.
Adjacency matrix of young phenotype networks :
		TAB1	CHUK	CSNK2A2	ERC1	CARD10	IRAK1	LBP	LTA	LTBR	PLCG2	PRKCB	PRKCQ	PTGS2	BTK	TNF	TRAF1	TRAF3	TRAF5	TNFSF11	BCL10	CD14	CD40
	TAB1	1	1	1	1	1	1	1	1	1	1	1	1	0	1	1	1	1	1	0	1	1	1
	CHUK	0	1	1	1	1	1	1	0	1	1	1	1	0	0	1	1	1	1	0	1	0	1
	CSNK2A2	0	0	0	0	0	0	0	0	0	0	0	0	0	0	1	1	0	0	0	0	0	0
	ERC1	0	0	0	0	0	0	1	0	0	0	0	0	0	0	0	0	1	0	0	0	0	0
	CARD10	0	0	0	0	0	0	0	0	0	0	0	0	0	0	0	0	0	1	0	1	0	0
	IRAK1	0	0	1	1	0	0	0	0	0	0	1	0	0	0	0	0	0	0	0	0	0	0
	LBP	0	0	0	0	0	0	0	0	0	1	0	0	0	0	0	0	0	0	0	0	0	0
	LTA	1	1	1	1	1	1	1	1	1	1	1	1	0	1	1	1	1	1	0	1	1	1
	LTBR	0	0	0	0	0	0	1	0	0	0	0	0	0	0	0	0	1	0	0	0	0	0
	PLCG2	0	1	1	1	1	1	1	0	1	1	1	1	0	0	1	1	1	1	0	1	0	1
	PRKCB	0	0	0	0	0	0	0	0	0	0	0	0	0	0	1	1	0	0	0	0	0	0
	PRKCQ	0	0	0	0	1	0	0	0	0	0	0	0	0	0	0	0	0	0	0	0	0	0
	PTGS2	0	0	0	0	0	0	0	0	0	0	0	1	0	0	0	0	0	0	0	0	0	0
	BTK	1	1	1	1	1	1	1	1	1	1	1	1	0	1	1	1	1	1	0	1	1	1
	TNF	0	0	0	0	0	0	0	0	1	0	0	0	0	0	0	0	0	0	0	0	0	0
	TRAF1	0	0	0	0	0	0	0	0	0	0	0	0	0	0	0	0	0	1	0	1	0	0
	TRAF3	0	0	0	0	0	0	0	0	0	1	0	0	0	0	0	0	0	0	0	0	0	0
	TRAF5	0	1	0	0	0	0	0	0	0	0	0	0	0	0	0	0	0	0	0	0	0	0
	TNFSF11	0	0	0	0	0	0	0	0	0	0	0	1	0	0	0	0	0	0	0	0	0	0
	BCL10	1	1	1	1	1	1	1	1	1	1	1	1	0	1	1	1	1	1	0	1	1	1
	CD14	1	1	1	1	1	1	1	1	1	1	1	1	0	1	1	1	1	1	0	1	1	1
	CD40	1	0	0	0	0	0	0	1	0	0	0	0	0	1	0	0	0	0	0	0	1	0
	Sum of dependencies :			158
Adjacency matrix of old phenotype networks :
		TAB1	CHUK	CSNK2A2	ERC1	CARD10	IRAK1	LBP	LTA	LTBR	PLCG2	PRKCB	PRKCQ	PTGS2	BTK	TNF	TRAF1	TRAF3	TRAF5	TNFSF11	BCL10	CD14	CD40
	TAB1	0	0	0	0	0	0	0	1	0	0	0	0	0	0	0	0	0	0	0	0	0	0
	CHUK	0	1	0	1	0	0	0	1	1	0	0	0	1	0	1	1	1	0	1	1	0	1
	CSNK2A2	0	0	0	1	0	0	0	1	1	0	0	0	0	0	1	0	1	0	1	1	0	1
	ERC1	0	0	0	0	0	0	0	0	0	0	1	1	0	0	0	0	0	0	0	0	0	0
	CARD10	0	0	0	0	0	0	0	0	0	0	0	0	0	0	0	0	0	0	0	0	0	0
	IRAK1	0	0	0	0	0	0	0	0	0	0	0	0	0	0	0	0	0	0	0	0	0	0
	LBP	1	1	1	1	0	0	0	1	1	0	1	1	1	1	1	1	1	0	1	1	0	1
	LTA	1	1	1	0	0	0	0	1	1	0	1	1	1	1	1	1	0	0	0	1	0	0
	LTBR	0	1	1	1	0	0	1	1	1	0	1	1	1	0	0	0	0	0	0	0	1	0
	PLCG2	0	0	0	0	0	0	0	0	0	0	0	0	0	0	0	0	0	0	0	0	0	0
	PRKCB	0	0	0	0	0	0	0	0	0	0	0	0	0	0	0	0	1	0	1	0	0	1
	PRKCQ	0	0	0	0	0	0	0	0	0	0	0	0	0	0	0	0	1	0	1	0	0	1
	PTGS2	0	1	0	1	0	0	0	1	1	0	0	0	1	0	1	1	1	0	1	1	0	1
	BTK	1	1	1	1	0	0	0	1	1	0	1	1	1	1	1	1	1	0	1	1	0	1
	TNF	0	0	1	0	0	0	0	0	0	0	0	0	0	0	0	0	0	0	0	0	0	0
	TRAF1	0	1	0	0	0	0	0	0	1	0	0	0	1	0	0	1	0	0	0	1	0	0
	TRAF3	0	0	0	1	0	0	0	0	0	0	0	0	0	0	0	0	0	0	0	0	0	0
	TRAF5	0	0	0	0	0	0	0	0	0	0	0	0	0	0	0	0	0	0	0	0	0	0
	TNFSF11	0	1	1	1	0	0	1	1	1	0	1	1	1	0	0	0	0	0	0	0	1	0
	BCL10	0	0	1	1	0	0	1	0	1	0	1	1	0	0	1	0	1	0	1	0	1	1
	CD14	0	0	0	0	0	0	0	0	0	0	0	0	0	0	0	0	1	0	1	0	0	1
	CD40	0	0	0	1	0	0	0	0	0	0	0	0	0	0	0	0	0	0	0	0	0	0
	Sum of dependencies :			125

## Sheet: S2 Interactions from STRING DB
Interaction graph as downloaded from STRING DB (12/07/2017) based on experimental data and curated database entries.
using this graph it was searched for a path for each dependency of the reconstructed Boolean networks. A direct or indirect connection for each dependency can be found using this graph
#node1	node2	node1_string_internal_id	node2_string_internal_id	node1_external_id	node2_external_id
MAP3K7	TRAF6	1855005	1852047	9606.ENSP00000358335	9606.ENSP00000337853
SSRP1	SUPT16H	1846565	1842582	9606.ENSP00000278412	9606.ENSP00000216297
RELA	NFKBIA	1858923	1842621	9606.ENSP00000384273	9606.ENSP00000216797
XIAP	CASP3	1853225	1849375	9606.ENSP00000347858	9606.ENSP00000311032
CSNK2B	CSNK2A1	1856397	1842650	9606.ENSP00000365025	9606.ENSP00000217244
MAP3K7	BIRC3	1855005	1845359	9606.ENSP00000358335	9606.ENSP00000263464
TLR4	BIRC3	1856025	1845359	9606.ENSP00000363089	9606.ENSP00000263464
TLR4	UBE2N	1856025	1849852	9606.ENSP00000363089	9606.ENSP00000316176
TLR4	IKBKG	1856025	1855067	9606.ENSP00000363089	9606.ENSP00000358622
MYD88	TLR4	1860276	1856025	9606.ENSP00000401399	9606.ENSP00000363089
MAP3K7	BIRC2	1855005	1843127	9606.ENSP00000358335	9606.ENSP00000227758
MAP3K7	UBE2N	1855005	1849852	9606.ENSP00000358335	9606.ENSP00000316176
CASP7	XIAP	1855004	1853225	9606.ENSP00000358327	9606.ENSP00000347858
TLR4	BIRC2	1856025	1843127	9606.ENSP00000363089	9606.ENSP00000227758
TRAF3	TICAM1	1858038	1843904	9606.ENSP00000376500	9606.ENSP00000248244
TRAF3	TLR4	1858038	1856025	9606.ENSP00000376500	9606.ENSP00000363089
TLR4	MAP3K7	1856025	1855005	9606.ENSP00000363089	9606.ENSP00000358335
TRAF6	TICAM1	1852047	1843904	9606.ENSP00000337853	9606.ENSP00000248244
IKBKG	MAP3K7	1855067	1855005	9606.ENSP00000358622	9606.ENSP00000358335
TLR4	TRAF6	1856025	1852047	9606.ENSP00000363089	9606.ENSP00000337853
MYD88	TRAF6	1860276	1852047	9606.ENSP00000401399	9606.ENSP00000337853
MYD88	MAP3K7	1860276	1855005	9606.ENSP00000401399	9606.ENSP00000358335
TLR4	TICAM1	1856025	1843904	9606.ENSP00000363089	9606.ENSP00000248244
CSNK2B	CSNK2A2	1856397	1845161	9606.ENSP00000365025	9606.ENSP00000262506
IKBKB	IKBKG	1861846	1855067	9606.ENSP00000430684	9606.ENSP00000358622
NFKB1	NFKBIA	1843094	1842621	9606.ENSP00000226574	9606.ENSP00000216797
XIAP	CASP9	1853225	1851230	9606.ENSP00000347858	9606.ENSP00000330237
TLR4	LY96	1856025	1846928	9606.ENSP00000363089	9606.ENSP00000284818
BIRC3	TRAF2	1845359	1843873	9606.ENSP00000263464	9606.ENSP00000247668
RELA	NFKB1	1858923	1843094	9606.ENSP00000384273	9606.ENSP00000226574
TRAF1	BIRC3	1856007	1845359	9606.ENSP00000362994	9606.ENSP00000263464
TRAF1	TRAF2	1856007	1843873	9606.ENSP00000362994	9606.ENSP00000247668
IKBKB	NFKB1	1861846	1843094	9606.ENSP00000430684	9606.ENSP00000226574
NFKB2	BCL3	1855147	1842291	9606.ENSP00000358983	9606.ENSP00000164227
NFKB1	BCL3	1843094	1842291	9606.ENSP00000226574	9606.ENSP00000164227
CHUK	NFKBIA	1855248	1842621	9606.ENSP00000359424	9606.ENSP00000216797
CSNK2B	SSRP1	1856397	1846565	9606.ENSP00000365025	9606.ENSP00000278412
REL	NFKBIA	1847519	1842621	9606.ENSP00000295025	9606.ENSP00000216797
SSRP1	CSNK2A1	1846565	1842650	9606.ENSP00000278412	9606.ENSP00000217244
CSNK2B	SUPT16H	1856397	1842582	9606.ENSP00000365025	9606.ENSP00000216297
CSNK2A1	SUPT16H	1842650	1842582	9606.ENSP00000217244	9606.ENSP00000216297
IKBKB	NFKBIA	1861846	1842621	9606.ENSP00000430684	9606.ENSP00000216797
CHUK	NFKB2	1855248	1855147	9606.ENSP00000359424	9606.ENSP00000358983
ENSG00000263020	CSNK2A1	1856398	1842650	9606.ENSP00000365040	9606.ENSP00000217244
ENSG00000263020	CSNK2A2	1856398	1845161	9606.ENSP00000365040	9606.ENSP00000262506
UBE2D2	BIRC3	1858646	1845359	9606.ENSP00000381717	9606.ENSP00000263464
CHUK	NFKB1	1855248	1843094	9606.ENSP00000359424	9606.ENSP00000226574
MYD88	IRAK4	1860276	1859507	9606.ENSP00000401399	9606.ENSP00000390651
CD40	CD40LG	1855654	1855311	9606.ENSP00000361359	9606.ENSP00000359663
LTA	TNFRSF1A	1860412	1842286	9606.ENSP00000403495	9606.ENSP00000162749
XIAP	TAB1	1853225	1842555	9606.ENSP00000347858	9606.ENSP00000216160
IRF3	TICAM1	1849262	1843904	9606.ENSP00000310127	9606.ENSP00000248244
PDPK1	AKT1	1852785	1846136	9606.ENSP00000344220	9606.ENSP00000270202
LTB	LTBR	1860851	1843171	9606.ENSP00000410481	9606.ENSP00000228918
TNF	TNFRSF1B	1860103	1856466	9606.ENSP00000398698	9606.ENSP00000365435
TNFRSF11B	TNFSF11	1847859	1843537	9606.ENSP00000297350	9606.ENSP00000239849
REL	NFKB1	1847519	1843094	9606.ENSP00000295025	9606.ENSP00000226574
TNFRSF11A	TNFSF11	1863918	1843537	9606.ENSP00000465500	9606.ENSP00000239849
RELA	NFKBIB	1858923	1849588	9606.ENSP00000384273	9606.ENSP00000312988
MAP3K7	TAB2	1855005	1847005	9606.ENSP00000358335	9606.ENSP00000286332
IKBKG	UBC	1855067	1852861	9606.ENSP00000358622	9606.ENSP00000344818
CASP8	BIRC2	1853692	1843127	9606.ENSP00000351273	9606.ENSP00000227758
IKBKB	NFKB2	1861846	1855147	9606.ENSP00000430684	9606.ENSP00000358983
NFKB1	RELB	1843094	1842834	9606.ENSP00000226574	9606.ENSP00000221452
CASP7	BIRC2	1855004	1843127	9606.ENSP00000358327	9606.ENSP00000227758
CASP7	BIRC3	1855004	1845359	9606.ENSP00000358327	9606.ENSP00000263464
NFKBIB	REL	1849588	1847519	9606.ENSP00000312988	9606.ENSP00000295025
MAP3K7	TLR3	1855005	1847791	9606.ENSP00000358335	9606.ENSP00000296795
NFKB2	NFKBIA	1855147	1842621	9606.ENSP00000358983	9606.ENSP00000216797
MAP3K7	TAB1	1855005	1842555	9606.ENSP00000358335	9606.ENSP00000216160
TLR3	TAB2	1847791	1847005	9606.ENSP00000296795	9606.ENSP00000286332
IKBKG	NFKBIA	1855067	1842621	9606.ENSP00000358622	9606.ENSP00000216797
TRAF6	TAB2	1852047	1847005	9606.ENSP00000337853	9606.ENSP00000286332
TAB2	RIPK1	1847005	1844726	9606.ENSP00000286332	9606.ENSP00000259808
IRAK1	TAB2	1855149	1847005	9606.ENSP00000358997	9606.ENSP00000286332
TRAF6	TLR3	1852047	1847791	9606.ENSP00000337853	9606.ENSP00000296795
TNF	IKBKG	1860103	1855067	9606.ENSP00000398698	9606.ENSP00000358622
CASP8	RIPK1	1853692	1844726	9606.ENSP00000351273	9606.ENSP00000259808
TNF	TAB2	1860103	1847005	9606.ENSP00000398698	9606.ENSP00000286332
TNF	TRADD	1860103	1852436	9606.ENSP00000398698	9606.ENSP00000341268
IKBKG	RIPK1	1855067	1844726	9606.ENSP00000358622	9606.ENSP00000259808
IRAK1	TRAF6	1855149	1852047	9606.ENSP00000358997	9606.ENSP00000337853
CASP3	BIRC2	1849375	1843127	9606.ENSP00000311032	9606.ENSP00000227758
IRAK1	IKBKG	1855149	1855067	9606.ENSP00000358997	9606.ENSP00000358622
TRAF2	TNFRSF1A	1843873	1842286	9606.ENSP00000247668	9606.ENSP00000162749
CASP3	BIRC3	1849375	1845359	9606.ENSP00000311032	9606.ENSP00000263464
IRAK4	IRAK1	1859507	1855149	9606.ENSP00000390651	9606.ENSP00000358997
TNF	RIPK1	1860103	1844726	9606.ENSP00000398698	9606.ENSP00000259808
RELA	REL	1858923	1847519	9606.ENSP00000384273	9606.ENSP00000295025
TNF	TNFRSF1A	1860103	1842286	9606.ENSP00000398698	9606.ENSP00000162749
MYD88	IL1R1	1860276	1843374	9606.ENSP00000401399	9606.ENSP00000233946
IRAK1	IL1R1	1855149	1843374	9606.ENSP00000358997	9606.ENSP00000233946
TNF	PSMC3	1860103	1847998	9606.ENSP00000398698	9606.ENSP00000298852
IRAK4	IL1R1	1859507	1843374	9606.ENSP00000390651	9606.ENSP00000233946
TRADD	RIPK1	1852436	1844726	9606.ENSP00000341268	9606.ENSP00000259808
TNF	TRAF2	1860103	1843873	9606.ENSP00000398698	9606.ENSP00000247668
NFKBIB	NFKB1	1849588	1843094	9606.ENSP00000312988	9606.ENSP00000226574
TNF	BIRC2	1860103	1843127	9606.ENSP00000398698	9606.ENSP00000227758
IKBKB	TNF	1861846	1860103	9606.ENSP00000430684	9606.ENSP00000398698
NFKBIB	NFKBIA	1849588	1842621	9606.ENSP00000312988	9606.ENSP00000216797
NFKB2	NFKBIB	1855147	1849588	9606.ENSP00000358983	9606.ENSP00000312988
PRKCD	PRKCB	1851365	1848723	9606.ENSP00000331602	9606.ENSP00000305355
RELA	CHUK	1858923	1855248	9606.ENSP00000384273	9606.ENSP00000359424
RELA	IKBKG	1858923	1855067	9606.ENSP00000384273	9606.ENSP00000358622
CASP8	TRAF2	1853692	1843873	9606.ENSP00000351273	9606.ENSP00000247668
TRAF1	CASP8	1856007	1853692	9606.ENSP00000362994	9606.ENSP00000351273
CHUK	PRKCB	1855248	1848723	9606.ENSP00000359424	9606.ENSP00000305355
TRAF6	IL1R1	1852047	1843374	9606.ENSP00000337853	9606.ENSP00000233946
CASP8	TRADD	1853692	1852436	9606.ENSP00000351273	9606.ENSP00000341268
TNF	MAP3K7	1860103	1855005	9606.ENSP00000398698	9606.ENSP00000358335
CSNK2A2	CSNK2A1	1845161	1842650	9606.ENSP00000262506	9606.ENSP00000217244
IKBKB	RELA	1861846	1858923	9606.ENSP00000430684	9606.ENSP00000384273
RIPK1	TRAF2	1844726	1843873	9606.ENSP00000259808	9606.ENSP00000247668
MAP3K7	XIAP	1855005	1853225	9606.ENSP00000358335	9606.ENSP00000347858
CHUK	IKBKG	1855248	1855067	9606.ENSP00000359424	9606.ENSP00000358622
CASP9	BIRC2	1851230	1843127	9606.ENSP00000330237	9606.ENSP00000227758
MYD88	TRAF3	1860276	1858038	9606.ENSP00000401399	9606.ENSP00000376500
TRAF6	UBE2N	1852047	1849852	9606.ENSP00000337853	9606.ENSP00000316176
UBE2D2	UBC	1858646	1852861	9606.ENSP00000381717	9606.ENSP00000344818
MYD88	BIRC3	1860276	1845359	9606.ENSP00000401399	9606.ENSP00000263464
UBC	UBE2N	1852861	1849852	9606.ENSP00000344818	9606.ENSP00000316176
PLCG2	BLNK	1853836	1842996	9606.ENSP00000352336	9606.ENSP00000224337
NFKB2	RELB	1855147	1842834	9606.ENSP00000358983	9606.ENSP00000221452
MYD88	TLR3	1860276	1847791	9606.ENSP00000401399	9606.ENSP00000296795
TLR3	TAB1	1847791	1842555	9606.ENSP00000296795	9606.ENSP00000216160
PDPK1	PRKCB	1852785	1848723	9606.ENSP00000344220	9606.ENSP00000305355
PDPK1	PRKCD	1852785	1851365	9606.ENSP00000344220	9606.ENSP00000331602
LTA	LTBR	1860412	1843171	9606.ENSP00000403495	9606.ENSP00000228918
TRAF6	TAB1	1852047	1842555	9606.ENSP00000337853	9606.ENSP00000216160
HDAC2	NFKB1	1861837	1843094	9606.ENSP00000430432	9606.ENSP00000226574
PDPK1	PRKCQ	1852785	1845292	9606.ENSP00000344220	9606.ENSP00000263125
CD40	TRAF2	1855654	1843873	9606.ENSP00000361359	9606.ENSP00000247668
TLR3	RIPK1	1847791	1844726	9606.ENSP00000296795	9606.ENSP00000259808
HDAC2	RELA	1861837	1858923	9606.ENSP00000430432	9606.ENSP00000384273
MAP3K7	TAB3	1855005	1847125	9606.ENSP00000358335	9606.ENSP00000288422
IKBKB	BIRC3	1861846	1845359	9606.ENSP00000430684	9606.ENSP00000263464
TRAF2	BIRC2	1843873	1843127	9606.ENSP00000247668	9606.ENSP00000227758
TANK	TRAF2	1844664	1843873	9606.ENSP00000259075	9606.ENSP00000247668
RELA	MAP3K7	1858923	1855005	9606.ENSP00000384273	9606.ENSP00000358335
PLCG2	EGFR	1853836	1846445	9606.ENSP00000352336	9606.ENSP00000275493
TRAF3	BIRC3	1858038	1845359	9606.ENSP00000376500	9606.ENSP00000263464
MAPK11	TAB1	1851615	1842555	9606.ENSP00000333685	9606.ENSP00000216160
RELA	NFKB2	1858923	1855147	9606.ENSP00000384273	9606.ENSP00000358983
TBK1	TICAM1	1851202	1843904	9606.ENSP00000329967	9606.ENSP00000248244
IKBKB	TNFRSF1A	1861846	1842286	9606.ENSP00000430684	9606.ENSP00000162749
IKBKB	TRAF2	1861846	1843873	9606.ENSP00000430684	9606.ENSP00000247668
IKBKB	CHUK	1861846	1855248	9606.ENSP00000430684	9606.ENSP00000359424
IRAK4	IRAK3	1859507	1844868	9606.ENSP00000390651	9606.ENSP00000261233
TRAF5	TRAF2	1844917	1843873	9606.ENSP00000261464	9606.ENSP00000247668
IRAK1	IRAK3	1855149	1844868	9606.ENSP00000358997	9606.ENSP00000261233
CHUK	MAP4K4	1855248	1849699	9606.ENSP00000359424	9606.ENSP00000314363
PSMC3	TRAF2	1847998	1843873	9606.ENSP00000298852	9606.ENSP00000247668
TAB3	TAB2	1847125	1847005	9606.ENSP00000288422	9606.ENSP00000286332
TANK	TICAM1	1844664	1843904	9606.ENSP00000259075	9606.ENSP00000248244
TAB2	TAB1	1847005	1842555	9606.ENSP00000286332	9606.ENSP00000216160
TRAF3	TRAF5	1858038	1844917	9606.ENSP00000376500	9606.ENSP00000261464
MAP3K1	TRAF2	1858732	1843873	9606.ENSP00000382423	9606.ENSP00000247668
TAB3	TAB1	1847125	1842555	9606.ENSP00000288422	9606.ENSP00000216160
PLCG2	PIK3R1	1853836	1846375	9606.ENSP00000352336	9606.ENSP00000274335
CD40	TRAF6	1855654	1852047	9606.ENSP00000361359	9606.ENSP00000337853
TRAF6	TRAF2	1852047	1843873	9606.ENSP00000337853	9606.ENSP00000247668
IKBKB	PRKCB	1861846	1848723	9606.ENSP00000430684	9606.ENSP00000305355
BIRC3	NFKB1	1845359	1843094	9606.ENSP00000263464	9606.ENSP00000226574
TRAF6	MAP4K4	1852047	1849699	9606.ENSP00000337853	9606.ENSP00000314363
BCL10	CARD10	1846181	1844092	9606.ENSP00000271015	9606.ENSP00000251973
TRAF3	CD40	1858038	1855654	9606.ENSP00000376500	9606.ENSP00000361359
IKBKG	TRAF2	1855067	1843873	9606.ENSP00000358622	9606.ENSP00000247668
MYD88	IRAK1	1860276	1855149	9606.ENSP00000401399	9606.ENSP00000358997
CD40	BIRC2	1855654	1843127	9606.ENSP00000361359	9606.ENSP00000227758
CD40	BIRC3	1855654	1845359	9606.ENSP00000361359	9606.ENSP00000263464
EGFR	PIK3R1	1846445	1846375	9606.ENSP00000275493	9606.ENSP00000274335
CHUK	TRAF2	1855248	1843873	9606.ENSP00000359424	9606.ENSP00000247668
CASP9	CASP3	1851230	1849375	9606.ENSP00000330237	9606.ENSP00000311032
IKBKB	AKT1	1861846	1846136	9606.ENSP00000430684	9606.ENSP00000270202
CASP9	BIRC3	1851230	1845359	9606.ENSP00000330237	9606.ENSP00000263464
CHUK	AKT1	1855248	1846136	9606.ENSP00000359424	9606.ENSP00000270202
RELA	RELB	1858923	1842834	9606.ENSP00000384273	9606.ENSP00000221452
TNF	LTBR	1860103	1843171	9606.ENSP00000398698	9606.ENSP00000228918
UBC	BIRC3	1852861	1845359	9606.ENSP00000344818	9606.ENSP00000263464
TRAF3	BIRC2	1858038	1843127	9606.ENSP00000376500	9606.ENSP00000227758
CASP8	BIRC3	1853692	1845359	9606.ENSP00000351273	9606.ENSP00000263464
PRKCD	PRKCQ	1851365	1845292	9606.ENSP00000331602	9606.ENSP00000263125
IKBKG	UBE2N	1855067	1849852	9606.ENSP00000358622	9606.ENSP00000316176
SSRP1	CSNK2A2	1846565	1845161	9606.ENSP00000278412	9606.ENSP00000262506
TLR3	TICAM1	1847791	1843904	9606.ENSP00000296795	9606.ENSP00000248244
CSNK2A2	SUPT16H	1845161	1842582	9606.ENSP00000262506	9606.ENSP00000216297
UBC	TAB2	1852861	1847005	9606.ENSP00000344818	9606.ENSP00000286332
UBC	TAB3	1852861	1847125	9606.ENSP00000344818	9606.ENSP00000288422
TRAF3	UBC	1858038	1852861	9606.ENSP00000376500	9606.ENSP00000344818
MAP3K7	UBC	1855005	1852861	9606.ENSP00000358335	9606.ENSP00000344818
IKBKG	BIRC3	1855067	1845359	9606.ENSP00000358622	9606.ENSP00000263464
TRAF1	BIRC2	1856007	1843127	9606.ENSP00000362994	9606.ENSP00000227758
IKBKG	BIRC2	1855067	1843127	9606.ENSP00000358622	9606.ENSP00000227758
BIRC3	TAB1	1845359	1842555	9606.ENSP00000263464	9606.ENSP00000216160
XIAP	UBC	1853225	1852861	9606.ENSP00000347858	9606.ENSP00000344818
UBC	BIRC2	1852861	1843127	9606.ENSP00000344818	9606.ENSP00000227758
MAP3K7	NFKBIA	1855005	1842621	9606.ENSP00000358335	9606.ENSP00000216797
RELA	BCL3	1858923	1842291	9606.ENSP00000384273	9606.ENSP00000164227
UBC	RIPK1	1852861	1844726	9606.ENSP00000344818	9606.ENSP00000259808
MAP3K7	PDPK1	1855005	1852785	9606.ENSP00000358335	9606.ENSP00000344220
CHUK	NFKBIB	1855248	1849588	9606.ENSP00000359424	9606.ENSP00000312988
BTK	BLNK	1849039	1842996	9606.ENSP00000308176	9606.ENSP00000224337
TNFRSF11A	TRAF6	1863918	1852047	9606.ENSP00000465500	9606.ENSP00000337853
RIPK1	NFKB1	1844726	1843094	9606.ENSP00000259808	9606.ENSP00000226574
MYD88	IRAK3	1860276	1844868	9606.ENSP00000401399	9606.ENSP00000261233
PLCG2	BTK	1853836	1849039	9606.ENSP00000352336	9606.ENSP00000308176
UBE2N	RIPK1	1849852	1844726	9606.ENSP00000316176	9606.ENSP00000259808
IKBKG	NFKBIB	1855067	1849588	9606.ENSP00000358622	9606.ENSP00000312988
IKBKB	NFKBIB	1861846	1849588	9606.ENSP00000430684	9606.ENSP00000312988
UBC	EGFR	1852861	1846445	9606.ENSP00000344818	9606.ENSP00000275493
IRAK4	TLR4	1859507	1856025	9606.ENSP00000390651	9606.ENSP00000363089
IKBKG	NFKB1	1855067	1843094	9606.ENSP00000358622	9606.ENSP00000226574
TBK1	TRAF2	1851202	1843873	9606.ENSP00000329967	9606.ENSP00000247668
TLR4	CD14	1856025	1848617	9606.ENSP00000363089	9606.ENSP00000304236
TRAF6	TNFSF11	1852047	1843537	9606.ENSP00000337853	9606.ENSP00000239849
PIK3R1	AKT1	1846375	1846136	9606.ENSP00000274335	9606.ENSP00000270202
RIPK1	TICAM1	1844726	1843904	9606.ENSP00000259808	9606.ENSP00000248244
UBE2D2	BIRC2	1858646	1843127	9606.ENSP00000381717	9606.ENSP00000227758
MAP3K7	TNFRSF1A	1855005	1842286	9606.ENSP00000358335	9606.ENSP00000162749
IKBKG	TRAF6	1855067	1852047	9606.ENSP00000358622	9606.ENSP00000337853
TBK1	TANK	1851202	1844664	9606.ENSP00000329967	9606.ENSP00000259075
IKBKB	MAP3K1	1861846	1858732	9606.ENSP00000430684	9606.ENSP00000382423
UBC	PSMC3	1852861	1847998	9606.ENSP00000344818	9606.ENSP00000298852
TRAF6	AKT1	1852047	1846136	9606.ENSP00000337853	9606.ENSP00000270202
RIPK1	TNFRSF1A	1844726	1842286	9606.ENSP00000259808	9606.ENSP00000162749
UBC	NFKBIA	1852861	1842621	9606.ENSP00000344818	9606.ENSP00000216797
MAP3K7	BCL10	1855005	1846181	9606.ENSP00000358335	9606.ENSP00000271015
IRAK1	MAP3K7	1855149	1855005	9606.ENSP00000358997	9606.ENSP00000358335
RELA	UBC	1858923	1852861	9606.ENSP00000384273	9606.ENSP00000344818
UBC	TRAF6	1852861	1852047	9606.ENSP00000344818	9606.ENSP00000337853
TRAF3	TRAF2	1858038	1843873	9606.ENSP00000376500	9606.ENSP00000247668
IKBKB	TRAF6	1861846	1852047	9606.ENSP00000430684	9606.ENSP00000337853
RIPK1	BIRC2	1844726	1843127	9606.ENSP00000259808	9606.ENSP00000227758
TLR3	LY96	1847791	1846928	9606.ENSP00000296795	9606.ENSP00000284818
XIAP	RIPK1	1853225	1844726	9606.ENSP00000347858	9606.ENSP00000259808
BIRC3	RIPK1	1845359	1844726	9606.ENSP00000263464	9606.ENSP00000259808
CHUK	TRAF6	1855248	1852047	9606.ENSP00000359424	9606.ENSP00000337853
TRAF6	TAB3	1852047	1847125	9606.ENSP00000337853	9606.ENSP00000288422
MAP3K7	PRKCQ	1855005	1845292	9606.ENSP00000358335	9606.ENSP00000263125
UBC	TBK1	1852861	1851202	9606.ENSP00000344818	9606.ENSP00000329967
MAP3K1	CHUK	1858732	1855248	9606.ENSP00000382423	9606.ENSP00000359424
UBC	TRAF2	1852861	1843873	9606.ENSP00000344818	9606.ENSP00000247668
TRAF3	TLR3	1858038	1847791	9606.ENSP00000376500	9606.ENSP00000296795
TRAF6	IRAK3	1852047	1844868	9606.ENSP00000337853	9606.ENSP00000261233
IKBKG	ERC1	1855067	1854082	9606.ENSP00000358622	9606.ENSP00000354158
CHUK	MAP3K7	1855248	1855005	9606.ENSP00000359424	9606.ENSP00000358335
MAP3K7	TRAF2	1855005	1843873	9606.ENSP00000358335	9606.ENSP00000247668
TBK1	IRF3	1851202	1849262	9606.ENSP00000329967	9606.ENSP00000310127
TRADD	TNFRSF1A	1852436	1842286	9606.ENSP00000341268	9606.ENSP00000162749
NFKB2	NFKB1	1855147	1843094	9606.ENSP00000358983	9606.ENSP00000226574
TRAF2	LTBR	1843873	1843171	9606.ENSP00000247668	9606.ENSP00000228918
TRAF3	LTBR	1858038	1843171	9606.ENSP00000376500	9606.ENSP00000228918
MAP4K4	RIPK1	1849699	1844726	9606.ENSP00000314363	9606.ENSP00000259808
BIRC2	TNFRSF1A	1843127	1842286	9606.ENSP00000227758	9606.ENSP00000162749
MAP3K7	MAP4K4	1855005	1849699	9606.ENSP00000358335	9606.ENSP00000314363
CHUK	TNFRSF1A	1855248	1842286	9606.ENSP00000359424	9606.ENSP00000162749
PRKCB	EGFR	1848723	1846445	9606.ENSP00000305355	9606.ENSP00000275493
CD14	TLR3	1848617	1847791	9606.ENSP00000304236	9606.ENSP00000296795
IRAK1	UBC	1855149	1852861	9606.ENSP00000358997	9606.ENSP00000344818
TRAF3	TBK1	1858038	1851202	9606.ENSP00000376500	9606.ENSP00000329967
IKBKG	TLR3	1855067	1847791	9606.ENSP00000358622	9606.ENSP00000296795
RELA	UBE2D2	1858923	1858646	9606.ENSP00000384273	9606.ENSP00000381717
LTA	TNFRSF1B	1860412	1856466	9606.ENSP00000403495	9606.ENSP00000365435
MAP3K1	MAP4K4	1858732	1849699	9606.ENSP00000382423	9606.ENSP00000314363
NFKB2	REL	1855147	1847519	9606.ENSP00000358983	9606.ENSP00000295025
IRAK4	TRAF6	1859507	1852047	9606.ENSP00000390651	9606.ENSP00000337853
PIK3R1	NFKBIA	1846375	1842621	9606.ENSP00000274335	9606.ENSP00000216797
IKBKB	MAP3K7	1861846	1855005	9606.ENSP00000430684	9606.ENSP00000358335
LTA	TNF	1860412	1860103	9606.ENSP00000403495	9606.ENSP00000398698
RELA	IRF3	1858923	1849262	9606.ENSP00000384273	9606.ENSP00000310127
TNF	CHUK	1860103	1855248	9606.ENSP00000398698	9606.ENSP00000359424
RELA	BIRC3	1858923	1845359	9606.ENSP00000384273	9606.ENSP00000263464
TNF	UBC	1860103	1852861	9606.ENSP00000398698	9606.ENSP00000344818
IKBKG	TNFRSF1A	1855067	1842286	9606.ENSP00000358622	9606.ENSP00000162749
IKBKG	TAB2	1855067	1847005	9606.ENSP00000358622	9606.ENSP00000286332
CHUK	PRKCQ	1855248	1845292	9606.ENSP00000359424	9606.ENSP00000263125
TRADD	TRAF2	1852436	1843873	9606.ENSP00000341268	9606.ENSP00000247668
TNFRSF1B	TRAF2	1856466	1843873	9606.ENSP00000365435	9606.ENSP00000247668
IKBKB	TAB1	1861846	1842555	9606.ENSP00000430684	9606.ENSP00000216160
CASP7	CASP8	1855004	1853692	9606.ENSP00000358327	9606.ENSP00000351273
TRAF1	CD40	1856007	1855654	9606.ENSP00000362994	9606.ENSP00000361359
CHUK	IRAK1	1855248	1855149	9606.ENSP00000359424	9606.ENSP00000358997
TNFRSF11A	TRAF2	1863918	1843873	9606.ENSP00000465500	9606.ENSP00000247668
TNFRSF1B	TRAF1	1856466	1856007	9606.ENSP00000365435	9606.ENSP00000362994
TNF	TAB1	1860103	1842555	9606.ENSP00000398698	9606.ENSP00000216160
IKBKG	TAB3	1855067	1847125	9606.ENSP00000358622	9606.ENSP00000288422
MAP3K7	RIPK1	1855005	1844726	9606.ENSP00000358335	9606.ENSP00000259808
CHUK	TAB2	1855248	1847005	9606.ENSP00000359424	9606.ENSP00000286332
BCL10	PRKCQ	1846181	1845292	9606.ENSP00000271015	9606.ENSP00000263125
PIK3R1	IL1R1	1846375	1843374	9606.ENSP00000274335	9606.ENSP00000233946
IKBKB	PRKCQ	1861846	1845292	9606.ENSP00000430684	9606.ENSP00000263125
CASP9	AKT1	1851230	1846136	9606.ENSP00000330237	9606.ENSP00000270202
IKBKB	IRAK1	1861846	1855149	9606.ENSP00000430684	9606.ENSP00000358997
BIRC3	TNFRSF1A	1845359	1842286	9606.ENSP00000263464	9606.ENSP00000162749
MYD88	IKBKG	1860276	1855067	9606.ENSP00000401399	9606.ENSP00000358622
IKBKG	BCL10	1855067	1846181	9606.ENSP00000358622	9606.ENSP00000271015
IKBKB	BCL10	1861846	1846181	9606.ENSP00000430684	9606.ENSP00000271015
XIAP	BIRC2	1853225	1843127	9606.ENSP00000347858	9606.ENSP00000227758
CASP8	CASP3	1853692	1849375	9606.ENSP00000351273	9606.ENSP00000311032
TRAF6	BCL10	1852047	1846181	9606.ENSP00000337853	9606.ENSP00000271015
CASP3	PRKCQ	1849375	1845292	9606.ENSP00000311032	9606.ENSP00000263125
CHUK	UBE2N	1855248	1849852	9606.ENSP00000359424	9606.ENSP00000316176
LTB	LTA	1860851	1860412	9606.ENSP00000410481	9606.ENSP00000403495
IKBKG	TAB1	1855067	1842555	9606.ENSP00000358622	9606.ENSP00000216160
XIAP	BIRC3	1853225	1845359	9606.ENSP00000347858	9606.ENSP00000263464
TAB2	TRAF2	1847005	1843873	9606.ENSP00000286332	9606.ENSP00000247668
CD14	LBP	1848617	1842663	9606.ENSP00000304236	9606.ENSP00000217407
IKBKB	CASP8	1861846	1853692	9606.ENSP00000430684	9606.ENSP00000351273
TRAF3	TANK	1858038	1844664	9606.ENSP00000376500	9606.ENSP00000259075
LTBR	BIRC2	1843171	1843127	9606.ENSP00000228918	9606.ENSP00000227758
IKBKG	PRKCQ	1855067	1845292	9606.ENSP00000358622	9606.ENSP00000263125
CHUK	CASP8	1855248	1853692	9606.ENSP00000359424	9606.ENSP00000351273
UBC	TAB1	1852861	1842555	9606.ENSP00000344818	9606.ENSP00000216160
TAB3	TRAF2	1847125	1843873	9606.ENSP00000288422	9606.ENSP00000247668
CHUK	BCL10	1855248	1846181	9606.ENSP00000359424	9606.ENSP00000271015
UBE2N	BCL10	1849852	1846181	9606.ENSP00000316176	9606.ENSP00000271015
XIAP	TRAF2	1853225	1843873	9606.ENSP00000347858	9606.ENSP00000247668
TRAF1	TNFRSF1A	1856007	1842286	9606.ENSP00000362994	9606.ENSP00000162749
MAP4K4	IL1R1	1849699	1843374	9606.ENSP00000314363	9606.ENSP00000233946
IKBKB	MAP4K4	1861846	1849699	9606.ENSP00000430684	9606.ENSP00000314363
IRAK1	NFKBIA	1855149	1842621	9606.ENSP00000358997	9606.ENSP00000216797
TRAF1	TRADD	1856007	1852436	9606.ENSP00000362994	9606.ENSP00000341268
PSMC3	BIRC2	1847998	1843127	9606.ENSP00000298852	9606.ENSP00000227758
NFKB2	UBC	1855147	1852861	9606.ENSP00000358983	9606.ENSP00000344818
TRAF3	TRAF1	1858038	1856007	9606.ENSP00000376500	9606.ENSP00000362994
TRADD	BIRC2	1852436	1843127	9606.ENSP00000341268	9606.ENSP00000227758
TNFRSF1B	TNFRSF1A	1856466	1842286	9606.ENSP00000365435	9606.ENSP00000162749
TRAF3	RIPK1	1858038	1844726	9606.ENSP00000376500	9606.ENSP00000259808
IKBKB	RIPK1	1861846	1844726	9606.ENSP00000430684	9606.ENSP00000259808
MAP3K7	ERC1	1855005	1854082	9606.ENSP00000358335	9606.ENSP00000354158
TRAF1	TANK	1856007	1844664	9606.ENSP00000362994	9606.ENSP00000259075
TNFRSF1B	TRADD	1856466	1852436	9606.ENSP00000365435	9606.ENSP00000341268
TRAF1	RIPK1	1856007	1844726	9606.ENSP00000362994	9606.ENSP00000259808
RELA	BIRC2	1858923	1843127	9606.ENSP00000384273	9606.ENSP00000227758
TNF	BIRC3	1860103	1845359	9606.ENSP00000398698	9606.ENSP00000263464
TNFRSF1B	RIPK1	1856466	1844726	9606.ENSP00000365435	9606.ENSP00000259808
MAP3K1	MAPK11	1858732	1851615	9606.ENSP00000382423	9606.ENSP00000333685
IKBKB	ERC1	1861846	1854082	9606.ENSP00000430684	9606.ENSP00000354158
TNFRSF11A	TRAF3	1863918	1858038	9606.ENSP00000465500	9606.ENSP00000376500
TRAF6	TANK	1852047	1844664	9606.ENSP00000337853	9606.ENSP00000259075
TRAF3	MAP4K4	1858038	1849699	9606.ENSP00000376500	9606.ENSP00000314363
CHUK	RIPK1	1855248	1844726	9606.ENSP00000359424	9606.ENSP00000259808
CASP8	TICAM1	1853692	1843904	9606.ENSP00000351273	9606.ENSP00000248244
TRAF3	TNFRSF1B	1858038	1856466	9606.ENSP00000376500	9606.ENSP00000365435
IRF3	TANK	1849262	1844664	9606.ENSP00000310127	9606.ENSP00000259075
IKBKG	CASP8	1855067	1853692	9606.ENSP00000358622	9606.ENSP00000351273
CHUK	TRADD	1855248	1852436	9606.ENSP00000359424	9606.ENSP00000341268
BIRC3	BIRC2	1845359	1843127	9606.ENSP00000263464	9606.ENSP00000227758
ERC1	NFKBIA	1854082	1842621	9606.ENSP00000354158	9606.ENSP00000216797
BCL10	NFKBIA	1846181	1842621	9606.ENSP00000271015	9606.ENSP00000216797
TRAF3	IRF3	1858038	1849262	9606.ENSP00000376500	9606.ENSP00000310127
TRAF1	CD40LG	1856007	1855311	9606.ENSP00000362994	9606.ENSP00000359663
CD40LG	BIRC3	1855311	1845359	9606.ENSP00000359663	9606.ENSP00000263464
MAP4K4	TRAF2	1849699	1843873	9606.ENSP00000314363	9606.ENSP00000247668
MAP4K4	TANK	1849699	1844664	9606.ENSP00000314363	9606.ENSP00000259075
XIAP	TAB2	1853225	1847005	9606.ENSP00000347858	9606.ENSP00000286332
CASP8	TNFRSF1A	1853692	1842286	9606.ENSP00000351273	9606.ENSP00000162749
IKBKB	MYD88	1861846	1860276	9606.ENSP00000430684	9606.ENSP00000401399
IKBKB	TAB2	1861846	1847005	9606.ENSP00000430684	9606.ENSP00000286332
CHUK	ERC1	1855248	1854082	9606.ENSP00000359424	9606.ENSP00000354158
CD40LG	TRAF2	1855311	1843873	9606.ENSP00000359663	9606.ENSP00000247668
CD40LG	BIRC2	1855311	1843127	9606.ENSP00000359663	9606.ENSP00000227758
UBE2D2	NFKBIA	1858646	1842621	9606.ENSP00000381717	9606.ENSP00000216797
MAP3K7	MAPK11	1855005	1851615	9606.ENSP00000358335	9606.ENSP00000333685
BTK	PIK3R1	1849039	1846375	9606.ENSP00000308176	9606.ENSP00000274335
RELA	IRAK1	1858923	1855149	9606.ENSP00000384273	9606.ENSP00000358997
RELA	BCL10	1858923	1846181	9606.ENSP00000384273	9606.ENSP00000271015
TRAF6	TNFRSF1A	1852047	1842286	9606.ENSP00000337853	9606.ENSP00000162749
LTA	BIRC2	1860412	1843127	9606.ENSP00000403495	9606.ENSP00000227758
TRADD	TRAF6	1852436	1852047	9606.ENSP00000341268	9606.ENSP00000337853
PRKCQ	TAB1	1845292	1842555	9606.ENSP00000263125	9606.ENSP00000216160
PSMC3	NFKB1	1847998	1843094	9606.ENSP00000298852	9606.ENSP00000226574
IRAK1	TAB1	1855149	1842555	9606.ENSP00000358997	9606.ENSP00000216160
TLR4	TBK1	1856025	1851202	9606.ENSP00000363089	9606.ENSP00000329967
NFKBIB	PSMC3	1849588	1847998	9606.ENSP00000312988	9606.ENSP00000298852
PSMC3	NFKBIA	1847998	1842621	9606.ENSP00000298852	9606.ENSP00000216797
NFKB2	PSMC3	1855147	1847998	9606.ENSP00000358983	9606.ENSP00000298852
TBK1	TLR3	1851202	1847791	9606.ENSP00000329967	9606.ENSP00000296795
UBE2N	TLR3	1849852	1847791	9606.ENSP00000316176	9606.ENSP00000296795
TLR3	BIRC2	1847791	1843127	9606.ENSP00000296795	9606.ENSP00000227758
NFKBIB	RIPK1	1849588	1844726	9606.ENSP00000312988	9606.ENSP00000259808
RIPK1	TAB1	1844726	1842555	9606.ENSP00000259808	9606.ENSP00000216160
UBC	TRADD	1852861	1852436	9606.ENSP00000344818	9606.ENSP00000341268
AKT1	NFKB1	1846136	1843094	9606.ENSP00000270202	9606.ENSP00000226574
MAP3K7	NFKBIB	1855005	1849588	9606.ENSP00000358335	9606.ENSP00000312988
RIPK1	NFKBIA	1844726	1842621	9606.ENSP00000259808	9606.ENSP00000216797
NFKB2	RIPK1	1855147	1844726	9606.ENSP00000358983	9606.ENSP00000259808
UBE2D2	TLR4	1858646	1856025	9606.ENSP00000381717	9606.ENSP00000363089
UBE2D2	TLR3	1858646	1847791	9606.ENSP00000381717	9606.ENSP00000296795
TLR4	RIPK1	1856025	1844726	9606.ENSP00000363089	9606.ENSP00000259808
TLR3	BIRC3	1847791	1845359	9606.ENSP00000296795	9606.ENSP00000263464
IRAK1	NFKB1	1855149	1843094	9606.ENSP00000358997	9606.ENSP00000226574
MAP3K7	NFKB1	1855005	1843094	9606.ENSP00000358335	9606.ENSP00000226574
NFKB2	IKBKG	1855147	1855067	9606.ENSP00000358983	9606.ENSP00000358622
TRAF2	TAB1	1843873	1842555	9606.ENSP00000247668	9606.ENSP00000216160
CASP8	NFKB1	1853692	1843094	9606.ENSP00000351273	9606.ENSP00000226574
CASP7	CASP3	1855004	1849375	9606.ENSP00000358327	9606.ENSP00000311032
CASP7	CASP9	1855004	1851230	9606.ENSP00000358327	9606.ENSP00000330237
TRAF6	RIPK1	1852047	1844726	9606.ENSP00000337853	9606.ENSP00000259808
IRAK1	UBE2N	1855149	1849852	9606.ENSP00000358997	9606.ENSP00000316176
CHUK	BIRC2	1855248	1843127	9606.ENSP00000359424	9606.ENSP00000227758
IKBKB	XIAP	1861846	1853225	9606.ENSP00000430684	9606.ENSP00000347858
IKBKB	BIRC2	1861846	1843127	9606.ENSP00000430684	9606.ENSP00000227758
UBE2D2	RIPK1	1858646	1844726	9606.ENSP00000381717	9606.ENSP00000259808
IRAK4	UBE2N	1859507	1849852	9606.ENSP00000390651	9606.ENSP00000316176
CHUK	BIRC3	1855248	1845359	9606.ENSP00000359424	9606.ENSP00000263464
TLR4	CASP8	1856025	1853692	9606.ENSP00000363089	9606.ENSP00000351273
TRAF6	TRAF5	1852047	1844917	9606.ENSP00000337853	9606.ENSP00000261464
CHUK	XIAP	1855248	1853225	9606.ENSP00000359424	9606.ENSP00000347858
CASP8	TLR3	1853692	1847791	9606.ENSP00000351273	9606.ENSP00000296795
PRKCD	NFKBIA	1851365	1842621	9606.ENSP00000331602	9606.ENSP00000216797
PRKCB	NFKBIA	1848723	1842621	9606.ENSP00000305355	9606.ENSP00000216797
CHUK	RELB	1855248	1842834	9606.ENSP00000359424	9606.ENSP00000221452
PRKCD	NFKB1	1851365	1843094	9606.ENSP00000331602	9606.ENSP00000226574
TLR4	TAB1	1856025	1842555	9606.ENSP00000363089	9606.ENSP00000216160
UBE2D2	IKBKG	1858646	1855067	9606.ENSP00000381717	9606.ENSP00000358622
UBC	NFKBIB	1852861	1849588	9606.ENSP00000344818	9606.ENSP00000312988
CSNK2A1	NFKBIA	1842650	1842621	9606.ENSP00000217244	9606.ENSP00000216797
UBC	NFKB1	1852861	1843094	9606.ENSP00000344818	9606.ENSP00000226574
TLR4	UBC	1856025	1852861	9606.ENSP00000363089	9606.ENSP00000344818
BIRC3	LTBR	1845359	1843171	9606.ENSP00000263464	9606.ENSP00000228918
TAB3	RIPK1	1847125	1844726	9606.ENSP00000288422	9606.ENSP00000259808
IRAK1	TAB3	1855149	1847125	9606.ENSP00000358997	9606.ENSP00000288422
TRAF3	TRAF6	1858038	1852047	9606.ENSP00000376500	9606.ENSP00000337853
MAP3K1	TLR4	1858732	1856025	9606.ENSP00000382423	9606.ENSP00000363089
RELA	RIPK1	1858923	1844726	9606.ENSP00000384273	9606.ENSP00000259808
MAP3K7	REL	1855005	1847519	9606.ENSP00000358335	9606.ENSP00000295025
MAP3K1	RIPK1	1858732	1844726	9606.ENSP00000382423	9606.ENSP00000259808
MAP3K1	MAP3K7	1858732	1855005	9606.ENSP00000382423	9606.ENSP00000358335
UBE2N	NFKB1	1849852	1843094	9606.ENSP00000316176	9606.ENSP00000226574
UBC	TLR3	1852861	1847791	9606.ENSP00000344818	9606.ENSP00000296795
TRAF6	PRKCQ	1852047	1845292	9606.ENSP00000337853	9606.ENSP00000263125
UBE2N	NFKBIA	1849852	1842621	9606.ENSP00000316176	9606.ENSP00000216797
UBC	REL	1852861	1847519	9606.ENSP00000344818	9606.ENSP00000295025
TRAF6	TBK1	1852047	1851202	9606.ENSP00000337853	9606.ENSP00000329967
UBE2D2	NFKB1	1858646	1843094	9606.ENSP00000381717	9606.ENSP00000226574
MAP3K7	TICAM1	1855005	1843904	9606.ENSP00000358335	9606.ENSP00000248244
XIAP	TNFRSF1A	1853225	1842286	9606.ENSP00000347858	9606.ENSP00000162749
PTGS2	MAPK11	1854602	1851615	9606.ENSP00000356438	9606.ENSP00000333685
MYD88	UBE2N	1860276	1849852	9606.ENSP00000401399	9606.ENSP00000316176
PRKCD	PIK3R1	1851365	1846375	9606.ENSP00000331602	9606.ENSP00000274335
TLR4	TAB2	1856025	1847005	9606.ENSP00000363089	9606.ENSP00000286332
CHUK	UBC	1855248	1852861	9606.ENSP00000359424	9606.ENSP00000344818
TLR3	TAB3	1847791	1847125	9606.ENSP00000296795	9606.ENSP00000288422
PIK3R1	NFKB1	1846375	1843094	9606.ENSP00000274335	9606.ENSP00000226574
RELA	UBE2N	1858923	1849852	9606.ENSP00000384273	9606.ENSP00000316176
TLR4	TAB3	1856025	1847125	9606.ENSP00000363089	9606.ENSP00000288422
TNF	TAB3	1860103	1847125	9606.ENSP00000398698	9606.ENSP00000288422
IKBKB	UBC	1861846	1852861	9606.ENSP00000430684	9606.ENSP00000344818
LTA	PSMC3	1860412	1847998	9606.ENSP00000403495	9606.ENSP00000298852
TRAF1	NFKB1	1856007	1843094	9606.ENSP00000362994	9606.ENSP00000226574
NFKBIA	TNFRSF1A	1842621	1842286	9606.ENSP00000216797	9606.ENSP00000162749
IKBKB	TICAM1	1861846	1843904	9606.ENSP00000430684	9606.ENSP00000248244
PDPK1	NFKBIA	1852785	1842621	9606.ENSP00000344220	9606.ENSP00000216797
TRAF1	NFKBIA	1856007	1842621	9606.ENSP00000362994	9606.ENSP00000216797
NFKB1	TNFRSF1A	1843094	1842286	9606.ENSP00000226574	9606.ENSP00000162749
CHUK	TICAM1	1855248	1843904	9606.ENSP00000359424	9606.ENSP00000248244
PDPK1	NFKB1	1852785	1843094	9606.ENSP00000344220	9606.ENSP00000226574
MAP3K1	TRAF6	1858732	1852047	9606.ENSP00000382423	9606.ENSP00000337853
TRAF6	CD14	1852047	1848617	9606.ENSP00000337853	9606.ENSP00000304236
BIRC3	TICAM1	1845359	1843904	9606.ENSP00000263464	9606.ENSP00000248244
TNFSF11	LTBR	1843537	1843171	9606.ENSP00000239849	9606.ENSP00000228918
REL	BCL10	1847519	1846181	9606.ENSP00000295025	9606.ENSP00000271015
TANK	TNFRSF1A	1844664	1842286	9606.ENSP00000259075	9606.ENSP00000162749
LY96	RIPK1	1846928	1844726	9606.ENSP00000284818	9606.ENSP00000259808
UBE2D2	CHUK	1858646	1855248	9606.ENSP00000381717	9606.ENSP00000359424
UBE2N	TICAM1	1849852	1843904	9606.ENSP00000316176	9606.ENSP00000248244
PLCG2	PRKCB	1853836	1848723	9606.ENSP00000352336	9606.ENSP00000305355
MAP3K1	TANK	1858732	1844664	9606.ENSP00000382423	9606.ENSP00000259075
TLR4	TLR3	1856025	1847791	9606.ENSP00000363089	9606.ENSP00000296795
TAB2	LY96	1847005	1846928	9606.ENSP00000286332	9606.ENSP00000284818
CHUK	CD14	1855248	1848617	9606.ENSP00000359424	9606.ENSP00000304236
UBE2D2	CD14	1858646	1848617	9606.ENSP00000381717	9606.ENSP00000304236
RELA	CASP8	1858923	1853692	9606.ENSP00000384273	9606.ENSP00000351273
MAP4K4	TNFRSF1A	1849699	1842286	9606.ENSP00000314363	9606.ENSP00000162749
TNFRSF1B	TNFSF11	1856466	1843537	9606.ENSP00000365435	9606.ENSP00000239849
RELA	TRADD	1858923	1852436	9606.ENSP00000384273	9606.ENSP00000341268
TRAF2	TNFSF11	1843873	1843537	9606.ENSP00000247668	9606.ENSP00000239849
TNF	CD40LG	1860103	1855311	9606.ENSP00000398698	9606.ENSP00000359663
IRAK3	IL1R1	1844868	1843374	9606.ENSP00000261233	9606.ENSP00000233946
MAP4K4	TAB2	1849699	1847005	9606.ENSP00000314363	9606.ENSP00000286332
TRADD	TAB2	1852436	1847005	9606.ENSP00000341268	9606.ENSP00000286332
CD14	LY96	1848617	1846928	9606.ENSP00000304236	9606.ENSP00000284818
RELA	TRAF2	1858923	1843873	9606.ENSP00000384273	9606.ENSP00000247668
MAP3K7	CD14	1855005	1848617	9606.ENSP00000358335	9606.ENSP00000304236
TAB3	BIRC2	1847125	1843127	9606.ENSP00000288422	9606.ENSP00000227758
ERC1	NFKB1	1854082	1843094	9606.ENSP00000354158	9606.ENSP00000226574
BIRC3	NFKBIA	1845359	1842621	9606.ENSP00000263464	9606.ENSP00000216797
CD14	TANK	1848617	1844664	9606.ENSP00000304236	9606.ENSP00000259075
RELA	PDPK1	1858923	1852785	9606.ENSP00000384273	9606.ENSP00000344220
IKBKG	REL	1855067	1847519	9606.ENSP00000358622	9606.ENSP00000295025
CD14	TAB1	1848617	1842555	9606.ENSP00000304236	9606.ENSP00000216160
IKBKB	UBE2N	1861846	1849852	9606.ENSP00000430684	9606.ENSP00000316176
TAB2	TICAM1	1847005	1843904	9606.ENSP00000286332	9606.ENSP00000248244
TAB2	TNFRSF1A	1847005	1842286	9606.ENSP00000286332	9606.ENSP00000162749
IKBKB	TLR3	1861846	1847791	9606.ENSP00000430684	9606.ENSP00000296795
MAP3K1	PLCG2	1858732	1853836	9606.ENSP00000382423	9606.ENSP00000352336
PDPK1	UBE2N	1852785	1849852	9606.ENSP00000344220	9606.ENSP00000316176
TRAF2	NFKBIA	1843873	1842621	9606.ENSP00000247668	9606.ENSP00000216797
TRAF6	MAPK11	1852047	1851615	9606.ENSP00000337853	9606.ENSP00000333685
CD40	NFKBIA	1855654	1842621	9606.ENSP00000361359	9606.ENSP00000216797
IKBKB	IRAK4	1861846	1859507	9606.ENSP00000430684	9606.ENSP00000390651
PLCG2	CD14	1853836	1848617	9606.ENSP00000352336	9606.ENSP00000304236
IRF3	LY96	1849262	1846928	9606.ENSP00000310127	9606.ENSP00000284818
BIRC3	TNFSF11	1845359	1843537	9606.ENSP00000263464	9606.ENSP00000239849
TLR4	TANK	1856025	1844664	9606.ENSP00000363089	9606.ENSP00000259075
TBK1	CD14	1851202	1848617	9606.ENSP00000329967	9606.ENSP00000304236
ERC1	TRAF6	1854082	1852047	9606.ENSP00000354158	9606.ENSP00000337853
CASP8	LY96	1853692	1846928	9606.ENSP00000351273	9606.ENSP00000284818
ERC1	TAB2	1854082	1847005	9606.ENSP00000354158	9606.ENSP00000286332
LY96	BIRC2	1846928	1843127	9606.ENSP00000284818	9606.ENSP00000227758
TNF	TRAF1	1860103	1856007	9606.ENSP00000398698	9606.ENSP00000362994
UBE2N	PRKCQ	1849852	1845292	9606.ENSP00000316176	9606.ENSP00000263125
CD14	TAB3	1848617	1847125	9606.ENSP00000304236	9606.ENSP00000288422
TAB2	BIRC2	1847005	1843127	9606.ENSP00000286332	9606.ENSP00000227758
PSMC3	TNFSF11	1847998	1843537	9606.ENSP00000298852	9606.ENSP00000239849
IKBKB	PDPK1	1861846	1852785	9606.ENSP00000430684	9606.ENSP00000344220
CD14	TAB2	1848617	1847005	9606.ENSP00000304236	9606.ENSP00000286332
MAP3K1	TNFRSF1A	1858732	1842286	9606.ENSP00000382423	9606.ENSP00000162749
TNFRSF1B	PSMC3	1856466	1847998	9606.ENSP00000365435	9606.ENSP00000298852
MYD88	RELA	1860276	1858923	9606.ENSP00000401399	9606.ENSP00000384273
PIK3R1	BLNK	1846375	1842996	9606.ENSP00000274335	9606.ENSP00000224337
UBC	TNFRSF1A	1852861	1842286	9606.ENSP00000344818	9606.ENSP00000162749
CD14	BIRC3	1848617	1845359	9606.ENSP00000304236	9606.ENSP00000263464
TAB1	TNFRSF1A	1842555	1842286	9606.ENSP00000216160	9606.ENSP00000162749
TNFRSF11A	BIRC3	1863918	1845359	9606.ENSP00000465500	9606.ENSP00000263464
IRF3	CD14	1849262	1848617	9606.ENSP00000310127	9606.ENSP00000304236
MAP3K1	TNFRSF1B	1858732	1856466	9606.ENSP00000382423	9606.ENSP00000365435
CD14	BIRC2	1848617	1843127	9606.ENSP00000304236	9606.ENSP00000227758
UBC	TICAM1	1852861	1843904	9606.ENSP00000344818	9606.ENSP00000248244
MAP3K1	CASP3	1858732	1849375	9606.ENSP00000382423	9606.ENSP00000311032
RELA	TNFRSF1A	1858923	1842286	9606.ENSP00000384273	9606.ENSP00000162749
MAP3K7	TRADD	1855005	1852436	9606.ENSP00000358335	9606.ENSP00000341268
IKBKB	CD14	1861846	1848617	9606.ENSP00000430684	9606.ENSP00000304236
LTB	TRAF2	1860851	1843873	9606.ENSP00000410481	9606.ENSP00000247668
TRAF6	LY96	1852047	1846928	9606.ENSP00000337853	9606.ENSP00000284818
TLR4	CHUK	1856025	1855248	9606.ENSP00000363089	9606.ENSP00000359424
TNFSF11	BIRC2	1843537	1843127	9606.ENSP00000239849	9606.ENSP00000227758
RELA	IL1R1	1858923	1843374	9606.ENSP00000384273	9606.ENSP00000233946
PLCG2	LY96	1853836	1846928	9606.ENSP00000352336	9606.ENSP00000284818
TRAF1	XIAP	1856007	1853225	9606.ENSP00000362994	9606.ENSP00000347858
TAB3	PRKCQ	1847125	1845292	9606.ENSP00000288422	9606.ENSP00000263125
MAPK11	TAB2	1851615	1847005	9606.ENSP00000333685	9606.ENSP00000286332
MAP3K1	TRADD	1858732	1852436	9606.ENSP00000382423	9606.ENSP00000341268
CASP3	RIPK1	1849375	1844726	9606.ENSP00000311032	9606.ENSP00000259808
UBC	CD14	1852861	1848617	9606.ENSP00000344818	9606.ENSP00000304236
TNFRSF11A	CD40LG	1863918	1855311	9606.ENSP00000465500	9606.ENSP00000359663
BIRC2	TAB1	1843127	1842555	9606.ENSP00000227758	9606.ENSP00000216160
TNFRSF1B	LTBR	1856466	1843171	9606.ENSP00000365435	9606.ENSP00000228918
IKBKB	TAB3	1861846	1847125	9606.ENSP00000430684	9606.ENSP00000288422
TRADD	NFKB1	1852436	1843094	9606.ENSP00000341268	9606.ENSP00000226574
LY96	TICAM1	1846928	1843904	9606.ENSP00000284818	9606.ENSP00000248244
IKBKB	REL	1861846	1847519	9606.ENSP00000430684	9606.ENSP00000295025
CHUK	LY96	1855248	1846928	9606.ENSP00000359424	9606.ENSP00000284818
TAB2	BIRC3	1847005	1845359	9606.ENSP00000286332	9606.ENSP00000263464
CD40LG	TRAF6	1855311	1852047	9606.ENSP00000359663	9606.ENSP00000337853
TRADD	BIRC3	1852436	1845359	9606.ENSP00000341268	9606.ENSP00000263464
MAP3K1	TRAF3	1858732	1858038	9606.ENSP00000382423	9606.ENSP00000376500
RELA	PSMC3	1858923	1847998	9606.ENSP00000384273	9606.ENSP00000298852
LTA	TNFSF11	1860412	1843537	9606.ENSP00000403495	9606.ENSP00000239849
LTB	BIRC2	1860851	1843127	9606.ENSP00000410481	9606.ENSP00000227758
ERC1	TAB1	1854082	1842555	9606.ENSP00000354158	9606.ENSP00000216160
IKBKB	TLR4	1861846	1856025	9606.ENSP00000430684	9606.ENSP00000363089
TRADD	CASP3	1852436	1849375	9606.ENSP00000341268	9606.ENSP00000311032
PSMC3	BIRC3	1847998	1845359	9606.ENSP00000298852	9606.ENSP00000263464
TLR4	LBP	1856025	1842663	9606.ENSP00000363089	9606.ENSP00000217407
RELA	MAP3K1	1858923	1858732	9606.ENSP00000384273	9606.ENSP00000382423
CASP8	CD14	1853692	1848617	9606.ENSP00000351273	9606.ENSP00000304236
TRAF3	CD40LG	1858038	1855311	9606.ENSP00000376500	9606.ENSP00000359663
CD40LG	TNFSF11	1855311	1843537	9606.ENSP00000359663	9606.ENSP00000239849
CHUK	PDPK1	1855248	1852785	9606.ENSP00000359424	9606.ENSP00000344220
TNF	XIAP	1860103	1853225	9606.ENSP00000398698	9606.ENSP00000347858
IKBKB	LY96	1861846	1846928	9606.ENSP00000430684	9606.ENSP00000284818
IL1R1	NFKB1	1843374	1843094	9606.ENSP00000233946	9606.ENSP00000226574
TNFRSF1B	CD40LG	1856466	1855311	9606.ENSP00000365435	9606.ENSP00000359663
TLR4	PLCG2	1856025	1853836	9606.ENSP00000363089	9606.ENSP00000352336
LTA	TRAF3	1860412	1858038	9606.ENSP00000403495	9606.ENSP00000376500
UBE2D2	TICAM1	1858646	1843904	9606.ENSP00000381717	9606.ENSP00000248244
UBE2D2	LY96	1858646	1846928	9606.ENSP00000381717	9606.ENSP00000284818
IKBKG	PDPK1	1855067	1852785	9606.ENSP00000358622	9606.ENSP00000344220
TLR4	MAP4K4	1856025	1849699	9606.ENSP00000363089	9606.ENSP00000314363
MYD88	CHUK	1860276	1855248	9606.ENSP00000401399	9606.ENSP00000359424
CD40LG	AKT1	1855311	1846136	9606.ENSP00000359663	9606.ENSP00000270202
UBC	LY96	1852861	1846928	9606.ENSP00000344818	9606.ENSP00000284818
MAP3K1	CD40LG	1858732	1855311	9606.ENSP00000382423	9606.ENSP00000359663
RIPK1	TANK	1844726	1844664	9606.ENSP00000259808	9606.ENSP00000259075
LTB	BIRC3	1860851	1845359	9606.ENSP00000410481	9606.ENSP00000263464
UBE2N	LY96	1849852	1846928	9606.ENSP00000316176	9606.ENSP00000284818
CD40	MAPK11	1855654	1851615	9606.ENSP00000361359	9606.ENSP00000333685
TRADD	TANK	1852436	1844664	9606.ENSP00000341268	9606.ENSP00000259075
IRF3	TLR3	1849262	1847791	9606.ENSP00000310127	9606.ENSP00000296795
MYD88	CD14	1860276	1848617	9606.ENSP00000401399	9606.ENSP00000304236
LTB	TNFRSF1B	1860851	1856466	9606.ENSP00000410481	9606.ENSP00000365435
CHUK	TAB1	1855248	1842555	9606.ENSP00000359424	9606.ENSP00000216160
LTB	CD40LG	1860851	1855311	9606.ENSP00000410481	9606.ENSP00000359663
CHUK	REL	1855248	1847519	9606.ENSP00000359424	9606.ENSP00000295025
XIAP	TAB3	1853225	1847125	9606.ENSP00000347858	9606.ENSP00000288422
TLR3	TANK	1847791	1844664	9606.ENSP00000296795	9606.ENSP00000259075
TNFRSF11A	LTA	1863918	1860412	9606.ENSP00000465500	9606.ENSP00000403495
IRAK4	LY96	1859507	1846928	9606.ENSP00000390651	9606.ENSP00000284818
LY96	TANK	1846928	1844664	9606.ENSP00000284818	9606.ENSP00000259075
CD40LG	NFKB1	1855311	1843094	9606.ENSP00000359663	9606.ENSP00000226574
LY96	LBP	1846928	1842663	9606.ENSP00000284818	9606.ENSP00000217407
MAP3K7	IL1R1	1855005	1843374	9606.ENSP00000358335	9606.ENSP00000233946
TRAF3	CD14	1858038	1848617	9606.ENSP00000376500	9606.ENSP00000304236
UBC	TANK	1852861	1844664	9606.ENSP00000344818	9606.ENSP00000259075
MAPK11	TAB3	1851615	1847125	9606.ENSP00000333685	9606.ENSP00000288422
TNF	TRAF3	1860103	1858038	9606.ENSP00000398698	9606.ENSP00000376500
CD40	AKT1	1855654	1846136	9606.ENSP00000361359	9606.ENSP00000270202
TRADD	TAB3	1852436	1847125	9606.ENSP00000341268	9606.ENSP00000288422
TLR4	IRF3	1856025	1849262	9606.ENSP00000363089	9606.ENSP00000310127
UBE2N	TAB3	1849852	1847125	9606.ENSP00000316176	9606.ENSP00000288422
XIAP	TRADD	1853225	1852436	9606.ENSP00000347858	9606.ENSP00000341268
MYD88	LY96	1860276	1846928	9606.ENSP00000401399	9606.ENSP00000284818
RELA	ERC1	1858923	1854082	9606.ENSP00000384273	9606.ENSP00000354158
TAB3	BIRC3	1847125	1845359	9606.ENSP00000288422	9606.ENSP00000263464
MAP3K7	LY96	1855005	1846928	9606.ENSP00000358335	9606.ENSP00000284818
MYD88	NFKB1	1860276	1843094	9606.ENSP00000401399	9606.ENSP00000226574
CD40LG	MAPK11	1855311	1851615	9606.ENSP00000359663	9606.ENSP00000333685
LTA	TRAF2	1860412	1843873	9606.ENSP00000403495	9606.ENSP00000247668
CASP3	TRAF2	1849375	1843873	9606.ENSP00000311032	9606.ENSP00000247668
CD14	TICAM1	1848617	1843904	9606.ENSP00000304236	9606.ENSP00000248244
IKBKG	TRADD	1855067	1852436	9606.ENSP00000358622	9606.ENSP00000341268
MAP3K1	CD40	1858732	1855654	9606.ENSP00000382423	9606.ENSP00000361359
TRADD	MAP4K4	1852436	1849699	9606.ENSP00000341268	9606.ENSP00000314363
CD40LG	NFKBIA	1855311	1842621	9606.ENSP00000359663	9606.ENSP00000216797
MAP3K1	IKBKG	1858732	1855067	9606.ENSP00000382423	9606.ENSP00000358622
UBE2D2	EGFR	1858646	1846445	9606.ENSP00000381717	9606.ENSP00000275493
BCL10	NFKB1	1846181	1843094	9606.ENSP00000271015	9606.ENSP00000226574
TNFRSF11A	PSMC3	1863918	1847998	9606.ENSP00000465500	9606.ENSP00000298852
TNFRSF11A	TNFRSF1B	1863918	1856466	9606.ENSP00000465500	9606.ENSP00000365435
UBE2N	TAB1	1849852	1842555	9606.ENSP00000316176	9606.ENSP00000216160
IKBKG	TICAM1	1855067	1843904	9606.ENSP00000358622	9606.ENSP00000248244
RELA	TRAF1	1858923	1856007	9606.ENSP00000384273	9606.ENSP00000362994
CHUK	TLR3	1855248	1847791	9606.ENSP00000359424	9606.ENSP00000296795
TNFRSF11A	LTB	1863918	1860851	9606.ENSP00000465500	9606.ENSP00000410481
MYD88	MAP3K1	1860276	1858732	9606.ENSP00000401399	9606.ENSP00000382423
UBE2D2	UBE2N	1858646	1849852	9606.ENSP00000381717	9606.ENSP00000316176
TNFRSF1B	BIRC2	1856466	1843127	9606.ENSP00000365435	9606.ENSP00000227758
TNFRSF11A	TNF	1863918	1860103	9606.ENSP00000465500	9606.ENSP00000398698
IKBKB	UBE2D2	1861846	1858646	9606.ENSP00000430684	9606.ENSP00000381717
LTA	CD40LG	1860412	1855311	9606.ENSP00000403495	9606.ENSP00000359663
BCL10	TAB1	1846181	1842555	9606.ENSP00000271015	9606.ENSP00000216160
CD40LG	LTBR	1855311	1843171	9606.ENSP00000359663	9606.ENSP00000228918
LTB	TNF	1860851	1860103	9606.ENSP00000410481	9606.ENSP00000398698
MAP3K1	IL1R1	1858732	1843374	9606.ENSP00000382423	9606.ENSP00000233946
LTB	TNFSF11	1860851	1843537	9606.ENSP00000410481	9606.ENSP00000239849
TICAM1	TAB1	1843904	1842555	9606.ENSP00000248244	9606.ENSP00000216160
TRAF3	TNFSF11	1858038	1843537	9606.ENSP00000376500	9606.ENSP00000239849
PDPK1	CASP9	1852785	1851230	9606.ENSP00000344220	9606.ENSP00000330237
IRAK4	CHUK	1859507	1855248	9606.ENSP00000390651	9606.ENSP00000359424
PLCG2	PRKCD	1853836	1851365	9606.ENSP00000352336	9606.ENSP00000331602
TNF	TNFSF11	1860103	1843537	9606.ENSP00000398698	9606.ENSP00000239849
IKBKG	LY96	1855067	1846928	9606.ENSP00000358622	9606.ENSP00000284818
PDPK1	TRAF6	1852785	1852047	9606.ENSP00000344220	9606.ENSP00000337853
UBE2N	TAB2	1849852	1847005	9606.ENSP00000316176	9606.ENSP00000286332
RELA	PRKCB	1858923	1848723	9606.ENSP00000384273	9606.ENSP00000305355
TNFRSF11A	LTBR	1863918	1843171	9606.ENSP00000465500	9606.ENSP00000228918
TRAF6	NFKB1	1852047	1843094	9606.ENSP00000337853	9606.ENSP00000226574
TICAM1	BIRC2	1843904	1843127	9606.ENSP00000248244	9606.ENSP00000227758
TAB2	BCL10	1847005	1846181	9606.ENSP00000286332	9606.ENSP00000271015
TAB3	BCL10	1847125	1846181	9606.ENSP00000288422	9606.ENSP00000271015
PDPK1	PIK3R1	1852785	1846375	9606.ENSP00000344220	9606.ENSP00000274335
TRAF6	NFKBIA	1852047	1842621	9606.ENSP00000337853	9606.ENSP00000216797
TNFRSF1B	TANK	1856466	1844664	9606.ENSP00000365435	9606.ENSP00000259075
TRAF3	LY96	1858038	1846928	9606.ENSP00000376500	9606.ENSP00000284818
IKBKG	XIAP	1855067	1853225	9606.ENSP00000358622	9606.ENSP00000347858
MAP3K1	CASP7	1858732	1855004	9606.ENSP00000382423	9606.ENSP00000358327
TAB3	TICAM1	1847125	1843904	9606.ENSP00000288422	9606.ENSP00000248244
PSMC3	REL	1847998	1847519	9606.ENSP00000298852	9606.ENSP00000295025
TBK1	LY96	1851202	1846928	9606.ENSP00000329967	9606.ENSP00000284818
CHUK	TAB3	1855248	1847125	9606.ENSP00000359424	9606.ENSP00000288422
MAPK11	TRAF2	1851615	1843873	9606.ENSP00000333685	9606.ENSP00000247668
PDPK1	BCL10	1852785	1846181	9606.ENSP00000344220	9606.ENSP00000271015
UBE2N	CD14	1849852	1848617	9606.ENSP00000316176	9606.ENSP00000304236
UBC	RELB	1852861	1842834	9606.ENSP00000344818	9606.ENSP00000221452
RELA	TRAF6	1858923	1852047	9606.ENSP00000384273	9606.ENSP00000337853
PRKCD	CASP3	1851365	1849375	9606.ENSP00000331602	9606.ENSP00000311032
CD40	NFKB1	1855654	1843094	9606.ENSP00000361359	9606.ENSP00000226574
TAB3	TNFRSF1A	1847125	1842286	9606.ENSP00000288422	9606.ENSP00000162749
PSMC3	LTBR	1847998	1843171	9606.ENSP00000298852	9606.ENSP00000228918
LY96	BIRC3	1846928	1845359	9606.ENSP00000284818	9606.ENSP00000263464
MYD88	NFKB2	1860276	1855147	9606.ENSP00000401399	9606.ENSP00000358983
MAP4K4	BIRC3	1849699	1845359	9606.ENSP00000314363	9606.ENSP00000263464
PRKCB	BCL10	1848723	1846181	9606.ENSP00000305355	9606.ENSP00000271015
CD40	MAP4K4	1855654	1849699	9606.ENSP00000361359	9606.ENSP00000314363
PSMC3	RELB	1847998	1842834	9606.ENSP00000298852	9606.ENSP00000221452
TRADD	TAB1	1852436	1842555	9606.ENSP00000341268	9606.ENSP00000216160
TNFRSF11A	BIRC2	1863918	1843127	9606.ENSP00000465500	9606.ENSP00000227758
LY96	TAB1	1846928	1842555	9606.ENSP00000284818	9606.ENSP00000216160
CD40LG	PSMC3	1855311	1847998	9606.ENSP00000359663	9606.ENSP00000298852
UBC	IRF3	1852861	1849262	9606.ENSP00000344818	9606.ENSP00000310127
IKBKB	TRADD	1861846	1852436	9606.ENSP00000430684	9606.ENSP00000341268
TNFRSF1B	BIRC3	1856466	1845359	9606.ENSP00000365435	9606.ENSP00000263464
PDPK1	TAB2	1852785	1847005	9606.ENSP00000344220	9606.ENSP00000286332
RELA	PRKCD	1858923	1851365	9606.ENSP00000384273	9606.ENSP00000331602
TRAF3	PSMC3	1858038	1847998	9606.ENSP00000376500	9606.ENSP00000298852
CHUK	IL1R1	1855248	1843374	9606.ENSP00000359424	9606.ENSP00000233946
RELA	CD40	1858923	1855654	9606.ENSP00000384273	9606.ENSP00000361359
MYD88	MAP4K4	1860276	1849699	9606.ENSP00000401399	9606.ENSP00000314363
IKBKG	CD14	1855067	1848617	9606.ENSP00000358622	9606.ENSP00000304236
CD40LG	MAP4K4	1855311	1849699	9606.ENSP00000359663	9606.ENSP00000314363
LTB	TRAF3	1860851	1858038	9606.ENSP00000410481	9606.ENSP00000376500
TRAF2	NFKB1	1843873	1843094	9606.ENSP00000247668	9606.ENSP00000226574
LTA	BIRC3	1860412	1845359	9606.ENSP00000403495	9606.ENSP00000263464
MAP3K1	TRAF1	1858732	1856007	9606.ENSP00000382423	9606.ENSP00000362994
TAB3	LY96	1847125	1846928	9606.ENSP00000288422	9606.ENSP00000284818
CD14	RIPK1	1848617	1844726	9606.ENSP00000304236	9606.ENSP00000259808
LTB	PSMC3	1860851	1847998	9606.ENSP00000410481	9606.ENSP00000298852
TAB2	PRKCQ	1847005	1845292	9606.ENSP00000286332	9606.ENSP00000263125
NFKBIB	BCL10	1849588	1846181	9606.ENSP00000312988	9606.ENSP00000271015
RELA	CD40LG	1858923	1855311	9606.ENSP00000384273	9606.ENSP00000359663
RELA	PIK3R1	1858923	1846375	9606.ENSP00000384273	9606.ENSP00000274335
RELB	NFKBIA	1842834	1842621	9606.ENSP00000221452	9606.ENSP00000216797
HDAC2	CSNK2A1	1861837	1842650	9606.ENSP00000430432	9606.ENSP00000217244
REL	RELB	1847519	1842834	9606.ENSP00000295025	9606.ENSP00000221452
IKBKG	TBK1	1855067	1851202	9606.ENSP00000358622	9606.ENSP00000329967
TNF	RELA	1860103	1858923	9606.ENSP00000398698	9606.ENSP00000384273
IKBKG	TANK	1855067	1844664	9606.ENSP00000358622	9606.ENSP00000259075
IKBKG	AKT1	1855067	1846136	9606.ENSP00000358622	9606.ENSP00000270202
TRAF3	TRADD	1858038	1852436	9606.ENSP00000376500	9606.ENSP00000341268
TRAF5	LTBR	1844917	1843171	9606.ENSP00000261464	9606.ENSP00000228918
CSNK2A2	NFKBIA	1845161	1842621	9606.ENSP00000262506	9606.ENSP00000216797
MAP3K7	TRAF5	1855005	1844917	9606.ENSP00000358335	9606.ENSP00000261464
IKBKB	BCL3	1861846	1842291	9606.ENSP00000430684	9606.ENSP00000164227
CHUK	BCL3	1855248	1842291	9606.ENSP00000359424	9606.ENSP00000164227
MAPK11	AKT1	1851615	1846136	9606.ENSP00000333685	9606.ENSP00000270202
TRAF5	RIPK1	1844917	1844726	9606.ENSP00000261464	9606.ENSP00000259808
IRAK4	TAB1	1859507	1842555	9606.ENSP00000390651	9606.ENSP00000216160
TBK1	REL	1851202	1847519	9606.ENSP00000329967	9606.ENSP00000295025
ENSG00000263020	NFKBIA	1856398	1842621	9606.ENSP00000365040	9606.ENSP00000216797
TLR4	NFKB1	1856025	1843094	9606.ENSP00000363089	9606.ENSP00000226574
MYD88	BIRC2	1860276	1843127	9606.ENSP00000401399	9606.ENSP00000227758
IRAK4	TAB2	1859507	1847005	9606.ENSP00000390651	9606.ENSP00000286332
IRAK4	TAB3	1859507	1847125	9606.ENSP00000390651	9606.ENSP00000288422
IKBKG	BTK	1855067	1849039	9606.ENSP00000358622	9606.ENSP00000308176
IRAK4	MAP3K7	1859507	1855005	9606.ENSP00000390651	9606.ENSP00000358335
UBE2D2	NFKBIB	1858646	1849588	9606.ENSP00000381717	9606.ENSP00000312988
RELA	TLR4	1858923	1856025	9606.ENSP00000384273	9606.ENSP00000363089
TNF	NFKB1	1860103	1843094	9606.ENSP00000398698	9606.ENSP00000226574
CD40	CHUK	1855654	1855248	9606.ENSP00000361359	9606.ENSP00000359424
IKBKB	CD40	1861846	1855654	9606.ENSP00000430684	9606.ENSP00000361359
TRAF3	BTK	1858038	1849039	9606.ENSP00000376500	9606.ENSP00000308176
CHUK	BTK	1855248	1849039	9606.ENSP00000359424	9606.ENSP00000308176
IKBKB	BTK	1861846	1849039	9606.ENSP00000430684	9606.ENSP00000308176
TRAF5	BIRC2	1844917	1843127	9606.ENSP00000261464	9606.ENSP00000227758
TAB2	TRAF5	1847005	1844917	9606.ENSP00000286332	9606.ENSP00000261464
MYD88	TAB3	1860276	1847125	9606.ENSP00000401399	9606.ENSP00000288422
CASP3	TNFRSF1A	1849375	1842286	9606.ENSP00000311032	9606.ENSP00000162749
TRAF5	TAB1	1844917	1842555	9606.ENSP00000261464	9606.ENSP00000216160
PRKCB	PRKCQ	1848723	1845292	9606.ENSP00000305355	9606.ENSP00000263125
TRADD	TRAF5	1852436	1844917	9606.ENSP00000341268	9606.ENSP00000261464
BTK	TRAF2	1849039	1843873	9606.ENSP00000308176	9606.ENSP00000247668
MYD88	TAB2	1860276	1847005	9606.ENSP00000401399	9606.ENSP00000286332
TRAF6	EGFR	1852047	1846445	9606.ENSP00000337853	9606.ENSP00000275493
BIRC3	TRAF5	1845359	1844917	9606.ENSP00000263464	9606.ENSP00000261464
MYD88	TAB1	1860276	1842555	9606.ENSP00000401399	9606.ENSP00000216160
CASP3	IL1R1	1849375	1843374	9606.ENSP00000311032	9606.ENSP00000233946
TAB3	TRAF5	1847125	1844917	9606.ENSP00000288422	9606.ENSP00000261464
IKBKG	IRF3	1855067	1849262	9606.ENSP00000358622	9606.ENSP00000310127
TRAF5	TNFRSF1A	1844917	1842286	9606.ENSP00000261464	9606.ENSP00000162749
REL	BCL3	1847519	1842291	9606.ENSP00000295025	9606.ENSP00000164227
NFKBIA	BCL3	1842621	1842291	9606.ENSP00000216797	9606.ENSP00000164227
ENSG00000263020	SSRP1	1856398	1846565	9606.ENSP00000365040	9606.ENSP00000278412
ENSG00000263020	SUPT16H	1856398	1842582	9606.ENSP00000365040	9606.ENSP00000216297
RELB	BCL3	1842834	1842291	9606.ENSP00000221452	9606.ENSP00000164227
CD40	TRAF5	1855654	1844917	9606.ENSP00000361359	9606.ENSP00000261464
TRAF6	BIRC2	1852047	1843127	9606.ENSP00000337853	9606.ENSP00000227758
MYD88	XIAP	1860276	1853225	9606.ENSP00000401399	9606.ENSP00000347858
TLR4	XIAP	1856025	1853225	9606.ENSP00000363089	9606.ENSP00000347858
BCL10	TRAF2	1846181	1843873	9606.ENSP00000271015	9606.ENSP00000247668
IKBKB	PSMC3	1861846	1847998	9606.ENSP00000430684	9606.ENSP00000298852
XIAP	AKT1	1853225	1846136	9606.ENSP00000347858	9606.ENSP00000270202
IKBKB	TRAF3	1861846	1858038	9606.ENSP00000430684	9606.ENSP00000376500
TRAF3	CHUK	1858038	1855248	9606.ENSP00000376500	9606.ENSP00000359424
CASP8	XIAP	1853692	1853225	9606.ENSP00000351273	9606.ENSP00000347858
CD40	IKBKG	1855654	1855067	9606.ENSP00000361359	9606.ENSP00000358622
CD40	UBE2N	1855654	1849852	9606.ENSP00000361359	9606.ENSP00000316176
CD40	MAP3K7	1855654	1855005	9606.ENSP00000361359	9606.ENSP00000358335
IKBKB	TRAF5	1861846	1844917	9606.ENSP00000430684	9606.ENSP00000261464
CHUK	TRAF5	1855248	1844917	9606.ENSP00000359424	9606.ENSP00000261464
TANK	BIRC2	1844664	1843127	9606.ENSP00000259075	9606.ENSP00000227758
XIAP	TBK1	1853225	1851202	9606.ENSP00000347858	9606.ENSP00000329967
BIRC3	TANK	1845359	1844664	9606.ENSP00000263464	9606.ENSP00000259075
TRAF6	BIRC3	1852047	1845359	9606.ENSP00000337853	9606.ENSP00000263464
NFKB2	BIRC2	1855147	1843127	9606.ENSP00000358983	9606.ENSP00000227758
CSNK2B	NFKBIA	1856397	1842621	9606.ENSP00000365025	9606.ENSP00000216797
TBK1	NFKBIA	1851202	1842621	9606.ENSP00000329967	9606.ENSP00000216797
TLR4	IRAK1	1856025	1855149	9606.ENSP00000363089	9606.ENSP00000358997
TICAM1	TRAF2	1843904	1843873	9606.ENSP00000248244	9606.ENSP00000247668
MAP4K4	CASP3	1849699	1849375	9606.ENSP00000314363	9606.ENSP00000311032
TLR4	BTK	1856025	1849039	9606.ENSP00000363089	9606.ENSP00000308176
MYD88	BTK	1860276	1849039	9606.ENSP00000401399	9606.ENSP00000308176
IKBKB	CSNK2B	1861846	1856397	9606.ENSP00000430684	9606.ENSP00000365025
TNFSF11	NFKBIA	1843537	1842621	9606.ENSP00000239849	9606.ENSP00000216797
AKT1	TNFSF11	1846136	1843537	9606.ENSP00000270202	9606.ENSP00000239849
TNFSF11	NFKB1	1843537	1843094	9606.ENSP00000239849	9606.ENSP00000226574
UBE2D2	XIAP	1858646	1853225	9606.ENSP00000381717	9606.ENSP00000347858
EGFR	RIPK1	1846445	1844726	9606.ENSP00000275493	9606.ENSP00000259808
TLR4	BCL10	1856025	1846181	9606.ENSP00000363089	9606.ENSP00000271015
BTK	PRKCQ	1849039	1845292	9606.ENSP00000308176	9606.ENSP00000263125
IRAK1	PRKCD	1855149	1851365	9606.ENSP00000358997	9606.ENSP00000331602
BTK	PRKCB	1849039	1848723	9606.ENSP00000308176	9606.ENSP00000305355
IRAK1	AKT1	1855149	1846136	9606.ENSP00000358997	9606.ENSP00000270202
IRAK1	BCL10	1855149	1846181	9606.ENSP00000358997	9606.ENSP00000271015
AKT1	PRKCQ	1846136	1845292	9606.ENSP00000270202	9606.ENSP00000263125
